# Supplementary material for: Heparins that block VEGF-A-mediated von Willebrand factor fiber generation are potent inhibitors of hematogenous but not lymphatic metastasis
Source: PubMed Central journal article supplement (PMC5356571; doi:10.18632/oncotarget.11832), 2016-09-02
Supplement: oncotarget-07-68527-s001.pdf [file oncotarget-07-68527-s001.pdf]

## Heparins that block VEGF-A-mediated von Willebrand factor fiber generation are potent inhibitors of hematogenous but not lymphatic metastasis

### SUPPLEMENTARY FIGURES AND TABLES

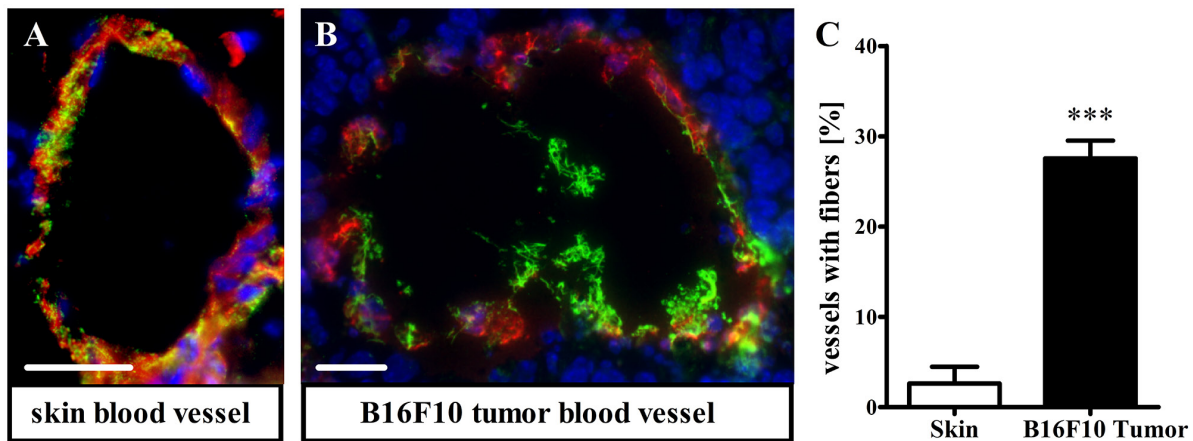

**Supplementary Figure S1: Intraluminal VWF fiber formation occurs in blood vessels of intradermal B16F10 tumors.** Tissue cryosections were stained for VWF (green) and CD31 (red). Nuclei were counterstained with DAPI (blue). **A.** In healthy skin vessels, VWF is stored in the endothelial cells of the vessel wall, indicating a quiescent endothelium. **B.** Tumor vessels show intraluminal VWF fiber formation and reduced endothelial VWF in the blood vessel wall, indicating endothelial cell activation. **C.** Quantification reveals increased VWF fiber formation in the B16F10 primary tumor vasculature. Data are presented as the mean  $\pm$  SEM. Blood vessels (n = 76 – 519) from 4-5 animals per group were analyzed. \*\*\*p < 0.001. Scale bar = 10  $\mu$ m.

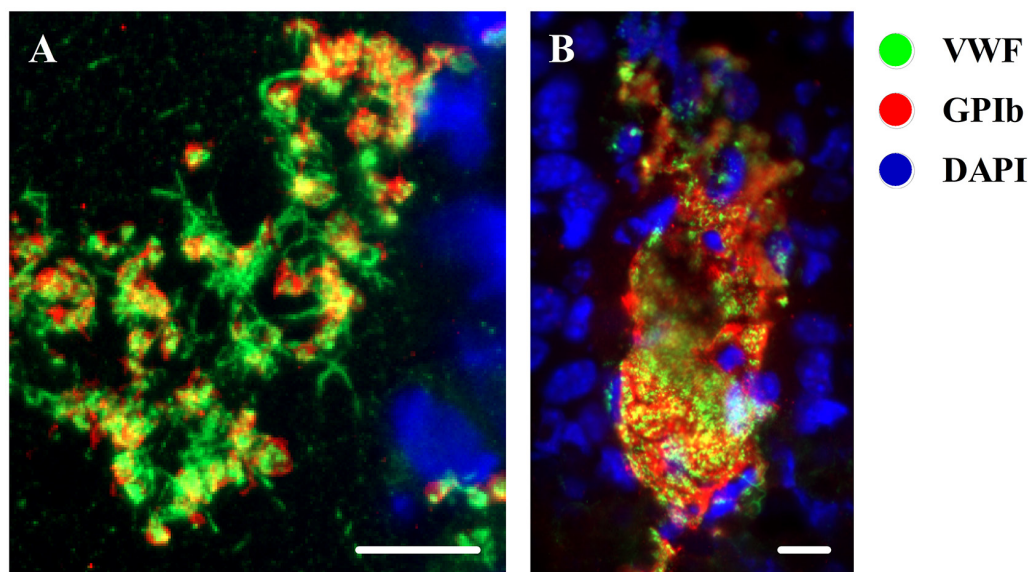

**Supplementary Figure S2: Intraluminal VWF fibers bind platelets to induce thrombus formation.** Cryosections of primary skin tumors were stained for VWF (green) and the platelet marker GPIb (red). Nuclei were counterstained with DAPI (blue). **A+B.** Representative images of tumor vessels demonstrate that VWF fibers within the lumen of a blood vessel mediate binding of platelets associated with thrombotic vessel occlusion. Scale bar = 10  $\mu$ m.

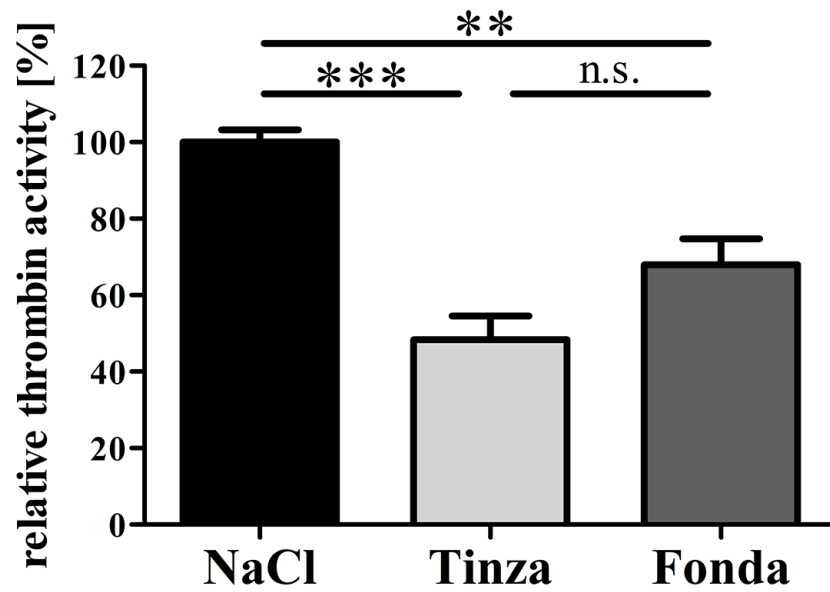

**Supplementary Figure S3: Tinzaparin and Fondaparinux are potent inhibitors of thrombin.** Thrombin activity was measured after subcutaneous injection of Tinzaparin, Fondaparinux or saline as control for 5 days in citrated plasma. Quantification reveals a significant decrease in thrombin activity after Tinzaparin (Tinza) and Fondaparinux (Fonda) treatment compared with the control (NaCl). The blood from 4-6 animals per group was analyzed. Data are presented as the mean  $\pm$  SEM. n.s. = not significant, \*\* $p < 0.01$ , \*\*\* $p < 0.001$ .

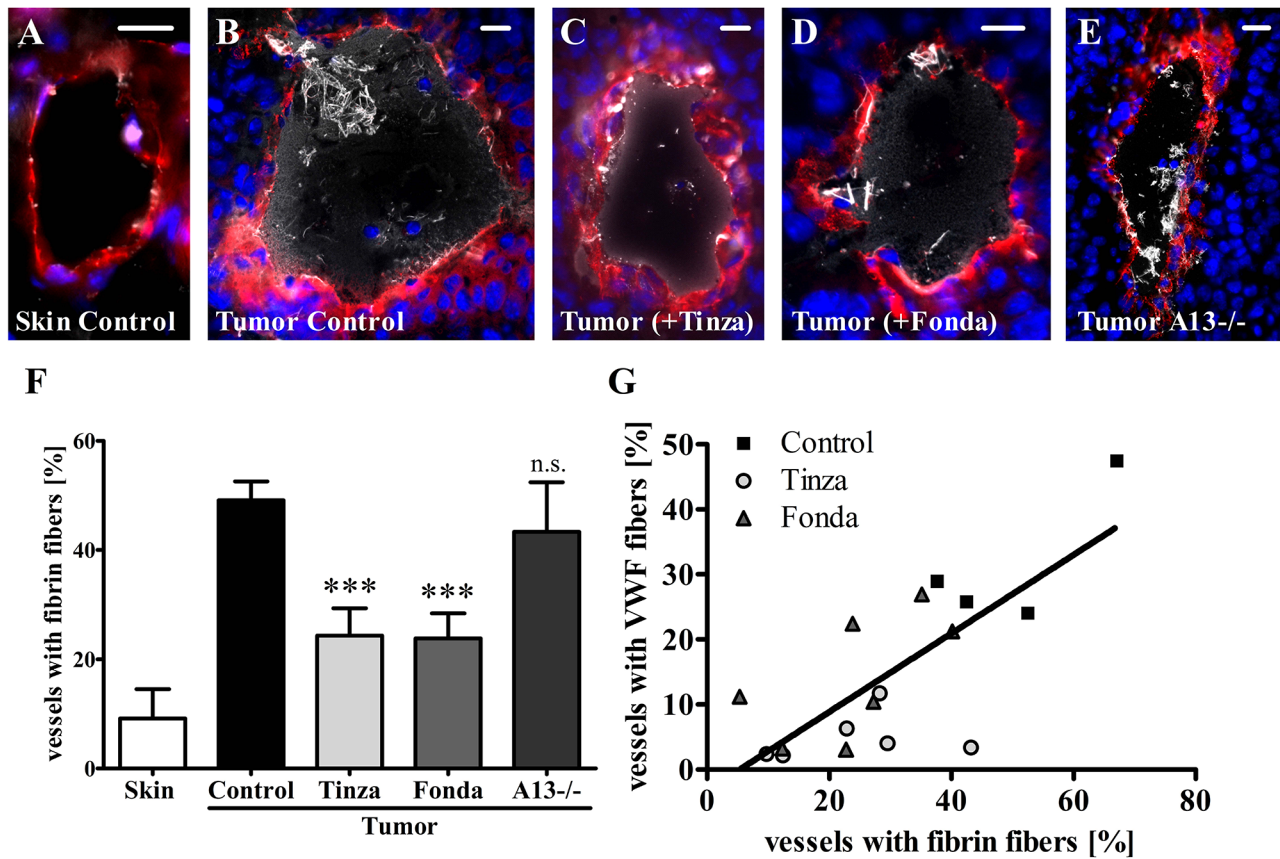

**Supplementary Figure S4: VWF fiber generation correlates with fibrin fiber formation in tumor blood vessels.** Immunofluorescence staining for fibrin (white) and CD31 (red) in cryosections of healthy skin or intradermally growing Ret tumors was performed. Nuclei were stained with DAPI (blue). **A – E.** Representative images of fibrin fiber formation in healthy skin (**A**), a control tumor (**B**), a tumor from a Tinzaparin (+Tinza)-treated mouse (**C**), a tumor from a Fondaparinux (+Fonda)-treated mouse (**D**) and a tumor from an ADAMTS13 (A13)<sup>-/-</sup> mouse (**E**). **F.** Quantification reveals a significantly decreased number of vessels with intraluminal fibrin fibers after the Tinzaparin and Fondaparinux treatments compared with the control. **G.** There is a positive correlation between VWF fibers and fibrin fiber formation ( $r = 0.76$ ). Tumor vessels ( $n = 516 - 857$ ) from 6-9 animals per group were analyzed and compared to healthy skin control ( $n = 34$  vessels from 4 samples). Data are presented as the mean  $\pm$  SEM. n.s. = not significant, \*\*\* $p < 0.001$  vs Tumor Control. Scale bars = 20  $\mu$ m.

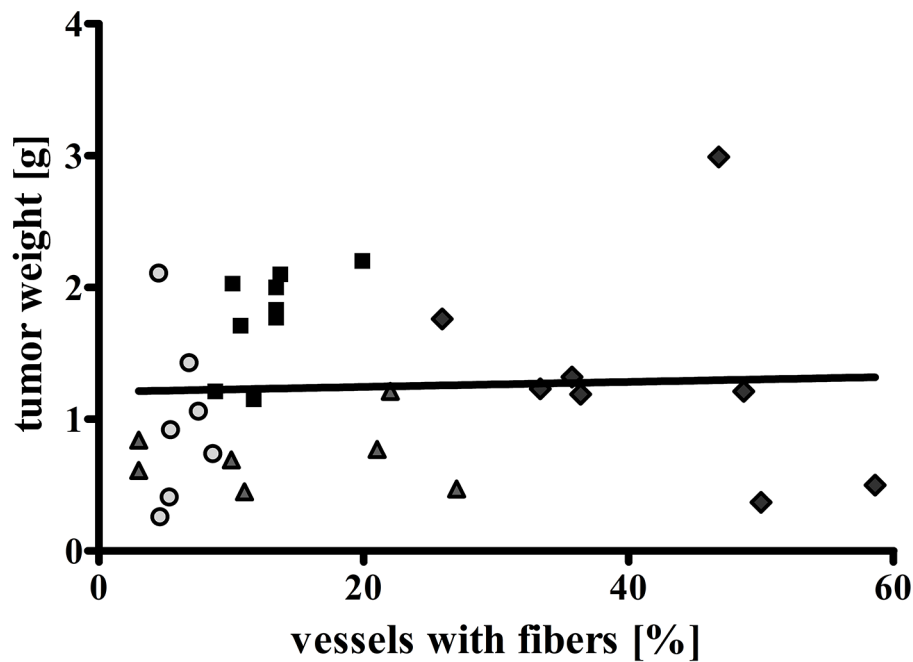

**Supplementary Figure S5: Correlation of VWF fiber formation and tumor growth.** Tumor weight as a function of the fiber-containing vessels shows no correlation between VWF-fiber formation and tumor growth ( $r = 0.25$ ).

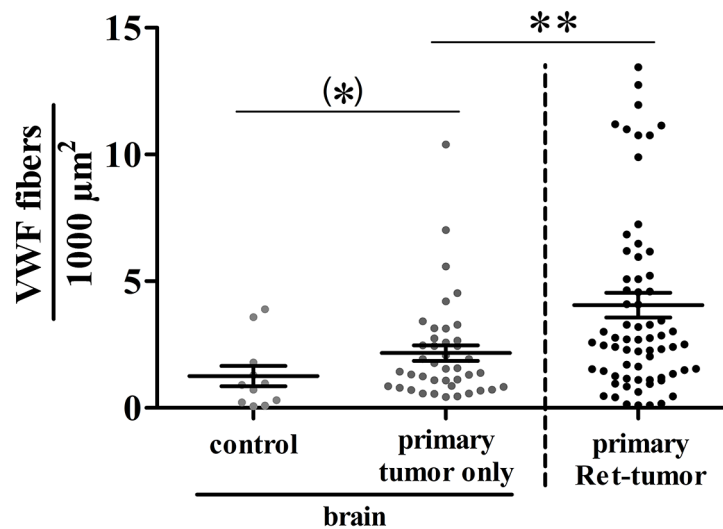

**Supplementary Figure S6: The VWF fiber density in the tumor microvasculature is higher than that in brain vessels.** Tissue sections of healthy brain tissue, of brain tissue from Ret tumor-bearing mice and primary tumor tissues were stained for VWF and CD31. Analysis of VWF fiber density expressed as the number of fibers per 1,000  $\mu\text{m}^2$  demonstrates a higher VWF density in activated brain vessels from tumor-bearing mice. The fiber density in the primary tumor is higher than in distal organ vessels.  $N = 4-6$  animals per group. Data are presented as the mean  $\pm$  SEM. n.s. = not significant, (\*) $p < 0.1$ , (\*\*) $p < 0.01$ .

**Supplementary Table S1: Analysis of microvasculatures in healthy skin and primary Ret skin tumors**

| Group                                         | Healthy skin |      | Ret Tumor |       |
|-----------------------------------------------|--------------|------|-----------|-------|
| Number of animals (n)                         | 4            |      | 4         |       |
| Mean percentage of vessels with fibers/animal | 2.0%         |      | 20.0%     |       |
| VWF fibers                                    | -            | +    | -         | +     |
| Absolute number of vessels/group              | 74           | 2    | 244       | 69    |
| Absolute percentage of vessels/group          | 97.4%        | 2.6% | 88.0%     | 22.0% |

Tissue cryosections were stained for VWF and CD31, and microvessels were analyzed for intraluminal VWF fiber formation. For the analysis, VWF fibers were defined as having a minimum length of 5  $\mu$ m.

**Supplementary Table S2: Analysis of microvasculatures in healthy skin and primary B16F10 skin tumors**

| Group                                         | Healthy skin |      | B16F10 Tumor |       |
|-----------------------------------------------|--------------|------|--------------|-------|
| Number of animals (n)                         | 4            |      | 5            |       |
| Mean percentage of vessels with fibers/animal | 2.0%         |      | 25.9%        |       |
| VWF fibers                                    | -            | +    | -            | +     |
| Absolute number of vessels/group              | 74           | 2    | 376          | 143   |
| Absolute percentage of vessels/group          | 97.4%        | 2.6% | 72.4%        | 27.6% |

Tissue cryosections were stained for VWF and CD31, and microvessels were analyzed for intraluminal VWF fiber formation. For the analysis, VWF fibers were defined as having a minimum length of 5  $\mu$ m.

**Supplementary Table S3: Analysis of microvasculatures in healthy skin and primary Ret skin tumors**

| Group                                         | Healthy skin |       | Tumor Control |       | Tumor (+Tinza) |       | Tumor (+Fonda) |       | Tumor A13-/- |       |
|-----------------------------------------------|--------------|-------|---------------|-------|----------------|-------|----------------|-------|--------------|-------|
| Number of animals (n)                         | 4            |       | 9             |       | 6              |       | 7              |       | 6            |       |
| Mean percentage of vessels with fibers/animal | 9.2%         |       | 49.1%         |       | 24.3%          |       | 23.8%          |       | 43.3%        |       |
| Fibrin fibers                                 | -            | +     | -             | +     | -              | +     | -              | +     | -            | +     |
| Absolute number of vessels/group              | 30           | 4     | 364           | 280   | 391            | 125   | 651            | 206   | 390          | 152   |
| Absolute percentage of vessels/group          | 88.2%        | 11.8% | 56.5%         | 43.5% | 75.8%          | 24.2% | 76.0%          | 24.0% | 72.0%        | 28.0% |

Mice were treated with Tinzaparin (+Tinza), Fondaparinux (+Fonda) or saline control. Tissue cryosections were stained for fibrin and CD31, and microvessels were analyzed for intraluminal fibrin fiber formation. For the analysis, fibrin fibers were defined as having a minimum length of 5  $\mu$ m.

**Supplementary Table S4: Analysis of microvasculatures in primary Ret skin tumors**

| Group                                         | Tumor Control         |       | Tumor (+Tinza) |      | Tumor (+Fonda) |       | Tumor A13-/- |       |
|-----------------------------------------------|-----------------------|-------|----------------|------|----------------|-------|--------------|-------|
|                                               | Number of animals (n) | 14    |                | 7    |                | 7     |              | 7     |
| Mean percentage of vessels with fibers/animal | 23.2%                 |       | 4.9%           |      | 14.1%          |       | 38.3%        |       |
| VWF fibers                                    | -                     | +     | -              | +    | -              | +     | -            | +     |
| Absolute number of vessels/group              | 1621                  | 593   | 1484           | 72   | 2052           | 317   | 966          | 714   |
| Absolute percentage of vessels/group          | 73.2%                 | 26.8% | 95.4%          | 4.6% | 86.6%          | 13.4% | 57.5%        | 42.5% |

Mice were treated with Tinzaparin (+Tinza), Fondaparinux (+Fonda) or saline control. Tissue cryosections were stained for VWF and CD31, and microvessels were analyzed for intraluminal VWF fiber formation. For the analysis, VWF fibers were defined as having a minimum length of 5  $\mu$ m.

**Supplementary Table S5: Analysis of microvasculatures in the lung, liver and brain tissues of healthy mice and mice with primary Ret skin tumors**

| Group                                         | Lung    |       |       |       | Liver   |       |       |       | Brain   |       |       |       |
|-----------------------------------------------|---------|-------|-------|-------|---------|-------|-------|-------|---------|-------|-------|-------|
|                                               | Control |       | Tumor |       | Control |       | Tumor |       | Control |       | Tumor |       |
| Number of animals (n)                         | 4       |       | 7     |       | 4       |       | 7     |       | 4       |       | 6     |       |
| Mean percentage of vessels with fibers/animal | 19.1%   |       | 50.2% |       | 11.2%   |       | 42.2% |       | 17.9%   |       | 38.4% |       |
| VWF fibers                                    | -       | +     | -     | +     | -       | +     | -     | +     | -       | +     | -     | +     |
| Absolute number of vessels/group              | 137     | 34    | 109   | 115   | 308     | 43    | 192   | 151   | 41      | 8     | 75    | 48    |
| Absolute percentage of vessels/group          | 80.1%   | 19.9% | 48.7% | 51.3% | 87.8%   | 12.2% | 56.0% | 44.0% | 83.7%   | 16.3% | 61.0% | 39.0% |

Tissue cryosections were stained for VWF and CD31, and microvessels were analyzed for intraluminal VWF fiber formation. For the analysis, VWF fibers were defined as having a minimum length of 5  $\mu$ m.

Supplementary Table S6: Analysis of microvasculatures in metastatic lungs

| Group                                         | Metastatic Lung Control |       | Metastatic Lung (+Tinza) |       | Metastatic Lung (+Fonda) |       | Metastatic Lung A13-/- |       |
|-----------------------------------------------|-------------------------|-------|--------------------------|-------|--------------------------|-------|------------------------|-------|
|                                               | -                       | +     | -                        | +     | -                        | +     | -                      | +     |
| Number of animals (n)                         | 9                       |       | 6                        |       | 6                        |       | 4                      |       |
| Mean percentage of vessels with fibers/animal | 39.1%                   |       | 13.0%                    |       | 34.4%                    |       | 48.3%                  |       |
| VWF fibers                                    | -                       | +     | -                        | +     | -                        | +     | -                      | +     |
| Absolute number of vessels/group              | 332                     | 217   | 297                      | 42    | 221                      | 107   | 120                    | 115   |
| Absolute percentage of vessels/group          | 60.5%                   | 39.5% | 87.6%                    | 12.4% | 67.4%                    | 32.6% | 51.1%                  | 48.9% |

Ret cells were intravenously injected into the tail vein to induce lung metastasis formation. Mice were treated with Tinzaparin (+Tinza), Fondaparinux (+Fonda) or saline control. Tissue cryosections were stained for VWF and CD31, and microvessels were analyzed for intraluminal VWF fiber formation. For the analysis, VWF fibers were defined as having a minimum length of 5  $\mu$ m.
